# Supplementary material for: Theoretical prediction and experimental synthesis of a Ba 0.5 Pb 0.5 S alloy via the molecular precursor route
Source: Royal Society of Chemistry journal article supplement (doi:10.1039/d4qi02090a), 2024-01-01
Supplement: d4qi02090a1.pdf [file d4qi02090a1.pdf]

Supporting Information

**Theoretical Prediction and Experimental Synthesis of Ba<sub>0.5</sub>Pb<sub>0.5</sub>S Alloy by Molecular Precursor Route**

Guoxin Wu<sup>1,2</sup>, Liang Wang<sup>2,\*</sup>, Kepeng Song<sup>1</sup>, Jiashuo Xu<sup>2</sup>, Jinghai Li<sup>1</sup>, Xinzhuo Fang<sup>1</sup>, Dan Huang<sup>4</sup>, Liqiang Zheng<sup>1</sup>, Qilin Wei<sup>1,\*</sup>, William W. Yu<sup>1,3,\*</sup>

1. School of Chemistry and Chemical Engineering, Shandong University, Jinan 250100, China.
2. School of Integrated Circuits, Shandong University, Jinan 250101, China.
3. Shandong Provincial Key Laboratory for Science of Material Creation and Energy Conversion, Science Center for Material Creation and Energy Conversion, Qingdao 266237; Ministry of Education Key Laboratory of Special Functional Aggregated Materials, Shandong Key Laboratory of Advanced Organosilicon Materials and Technologies, Jinan 250100, China.
4. State Key Laboratory of Featured Metal Materials and Life-cycle Safety for Composite Structures, School of Physical Science and Technology, Guangxi University, Nanning 530004, China.

\* Corresponding authors: [qlwei@sdu.edu.cn](mailto:qlwei@sdu.edu.cn) (Q. Wei), [liangwang2023@sdu.edu.cn](mailto:liangwang2023@sdu.edu.cn) (L. Wang), [wyu6000@gmail.com](mailto:wyu6000@gmail.com) (W. W. Yu).

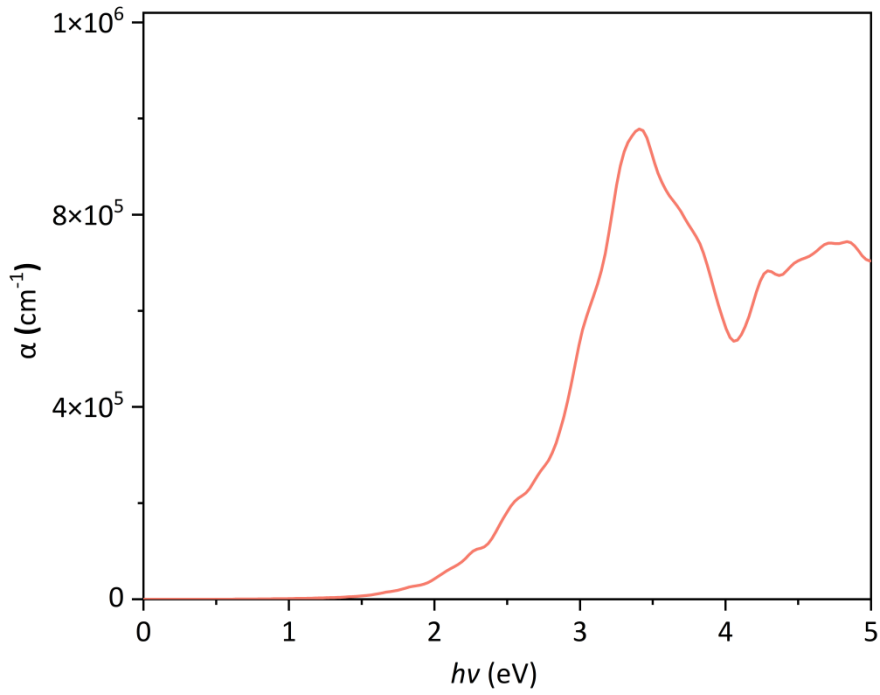

Figure S1. Theoretical absorption spectra for  $\text{Ba}_{0.5}\text{Pb}_{0.5}\text{S}$  in X, Y and Z directions.

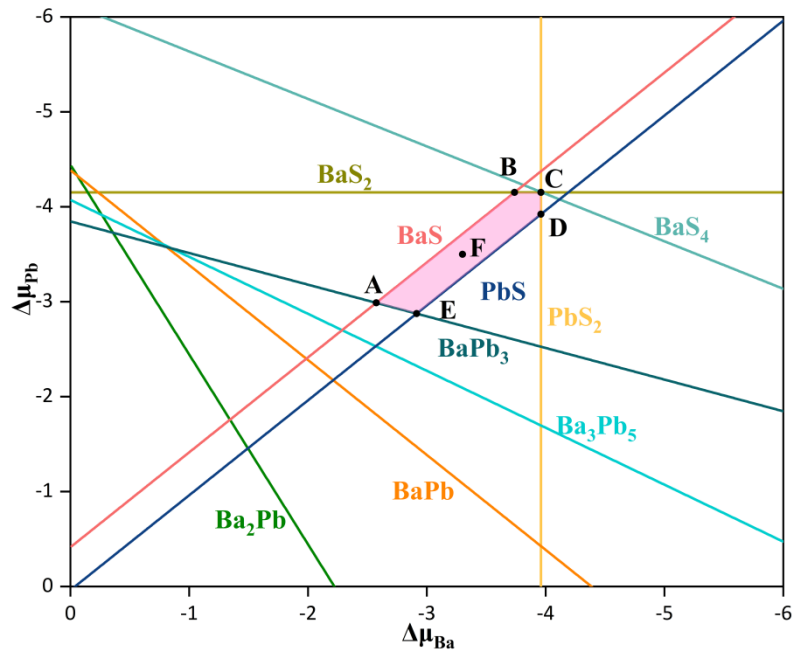

Figure S2. Stable chemical potential region of  $\text{Ba}_{0.5}\text{Pb}_{0.5}\text{S}$ .

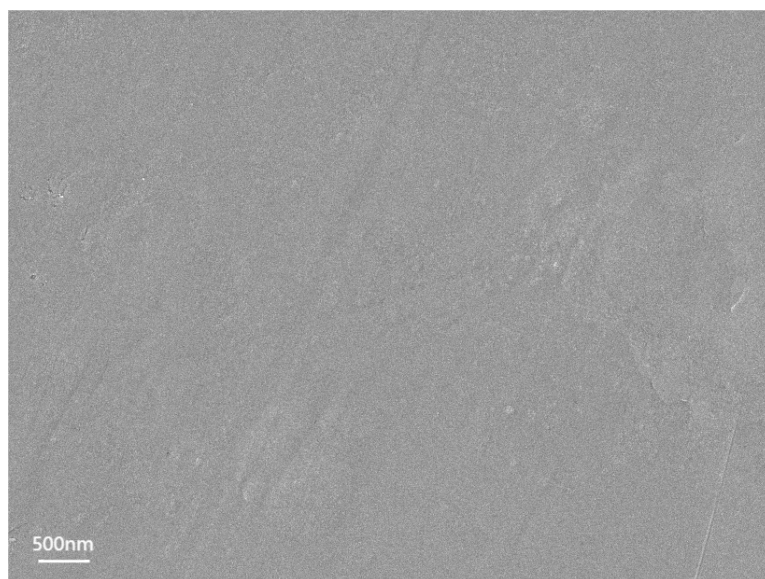

Figure S3. SEM image of Ba<sub>0.5</sub>Pb<sub>0.5</sub>S thin film.

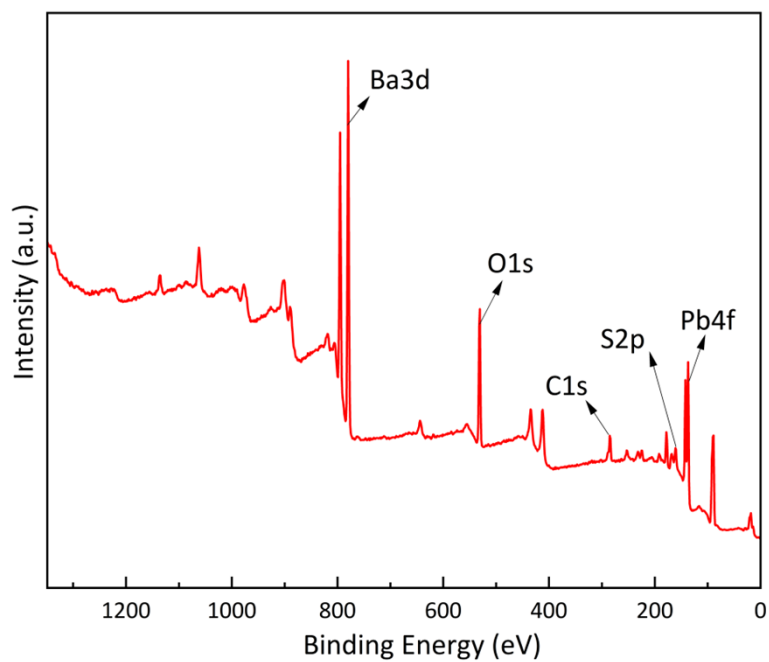

Figure S4. XPS spectra of  $\text{Ba}_{0.5}\text{Pb}_{0.5}\text{S}$ .

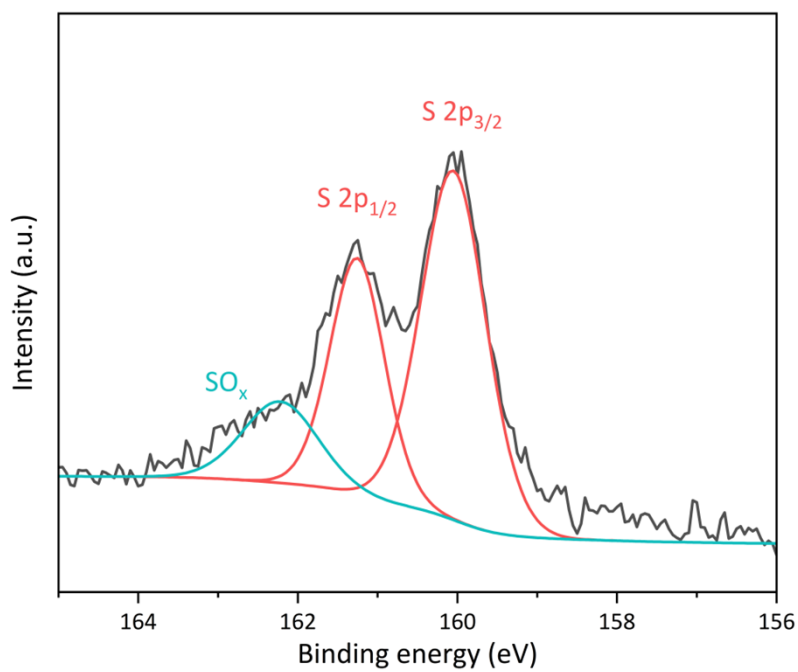

Figure S5. XPS spectra of S 2p.

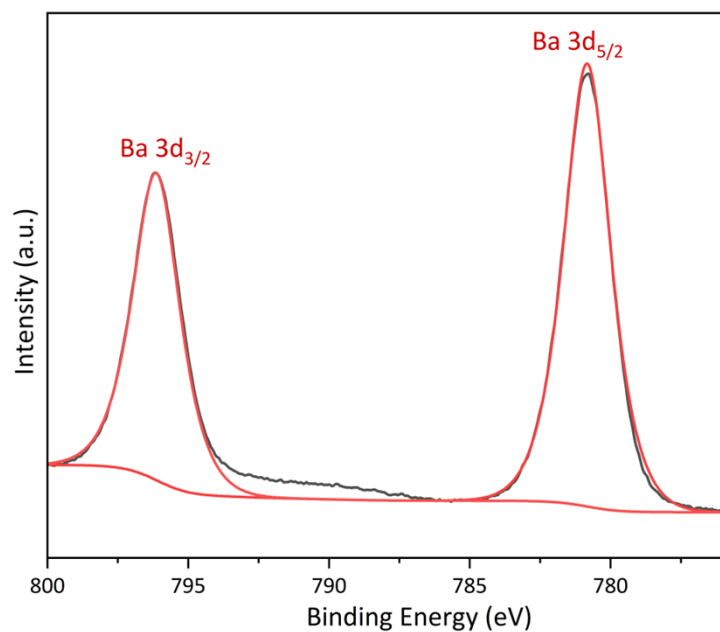

Figure S6. XPS spectra of Ba 3d.

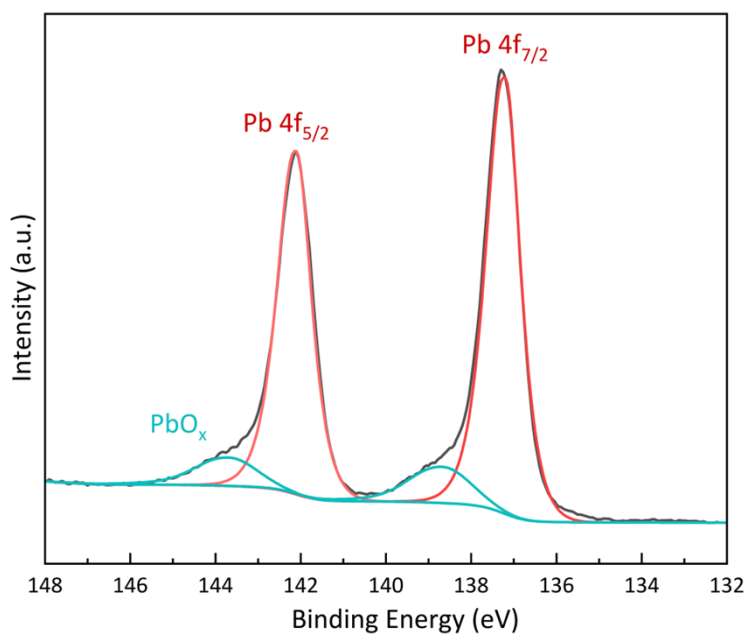

Figure S7. Pb 4f XPS spectra.

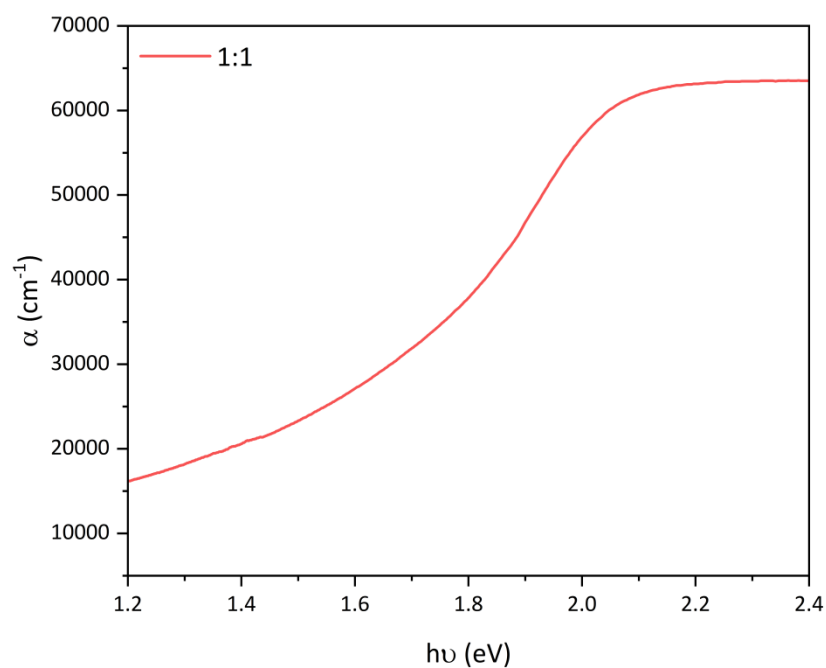

Figure S8. Plot of absorption coefficient ( $\alpha$ ) as a function of  $h\nu$ .

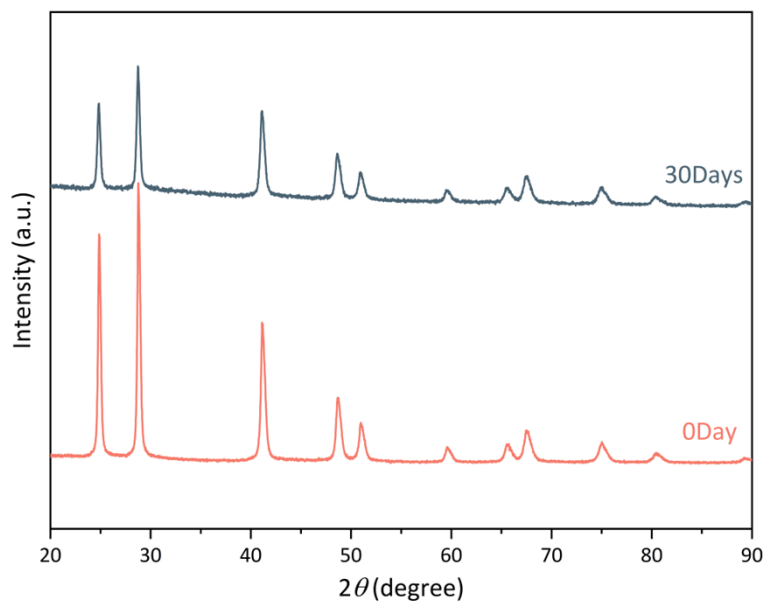

Figure S9.  $\text{Ba}_{0.5}\text{Pb}_{0.5}\text{S}$  storage stability test under high-humidity condition.

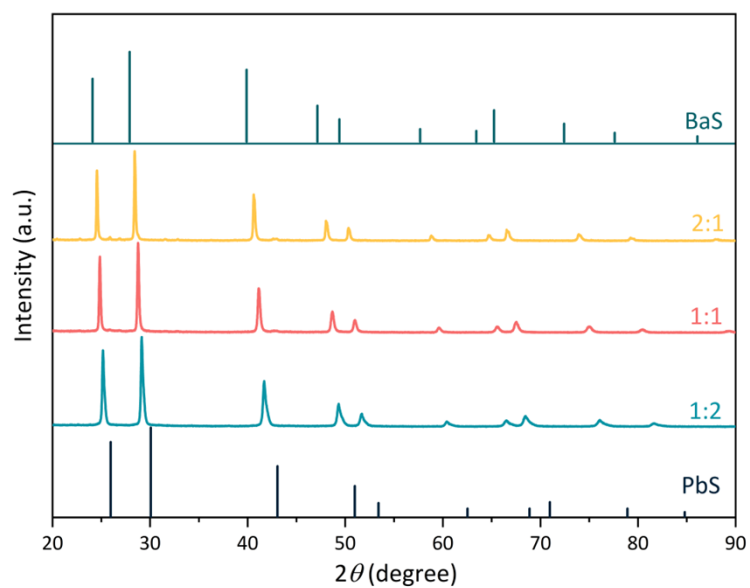

Figure S10. XRD of Ba-Pb-S alloys with different Ba-Pb feed ratios.

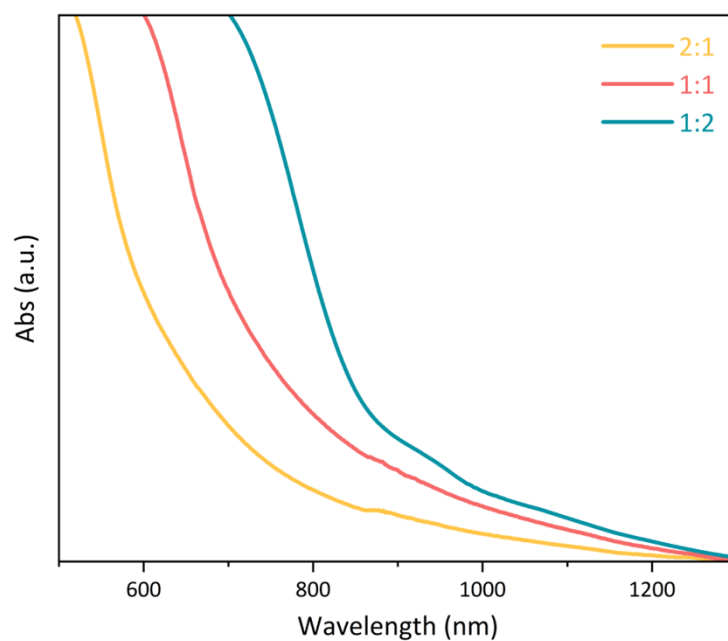

Figure S11. Absorption spectrum of Ba-Pb-S alloys with different Ba-Pb feed ratios.

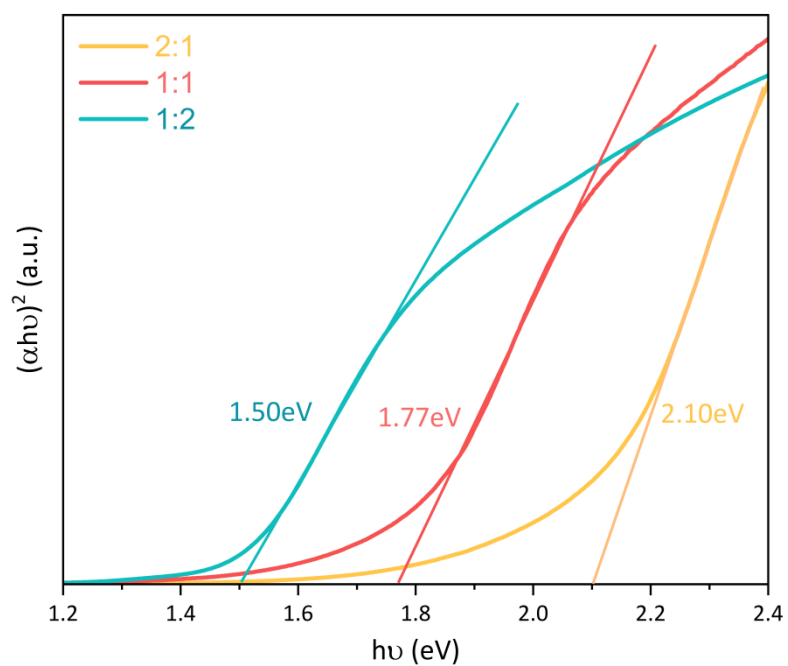

Figure S12. Band gap estimation of Ba-Pb-S alloys with different Ba-Pb feed ratios.

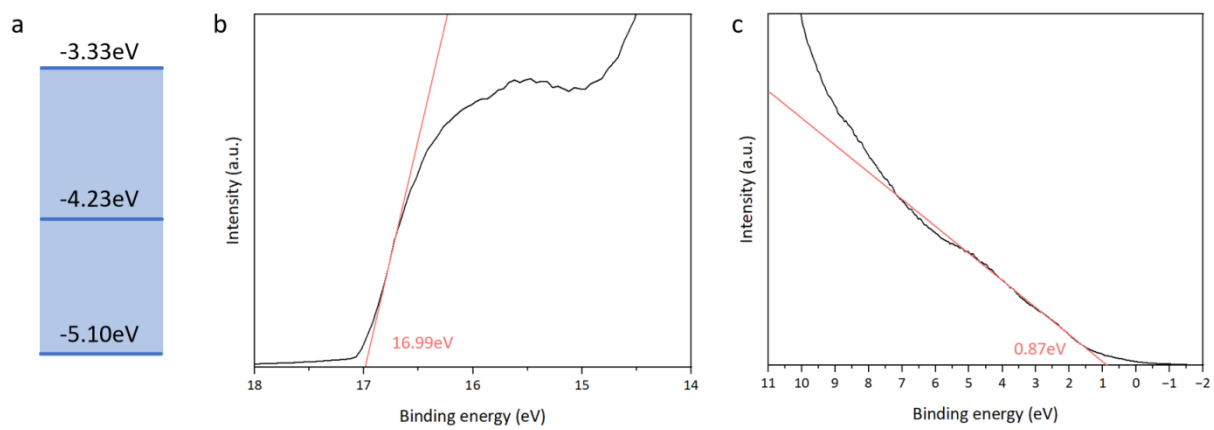

Figure S13. Energy level diagram (a) and UPS spectrum (b,c) of  $\text{Ba}_{0.5}\text{Pb}_{0.5}\text{S}$ .



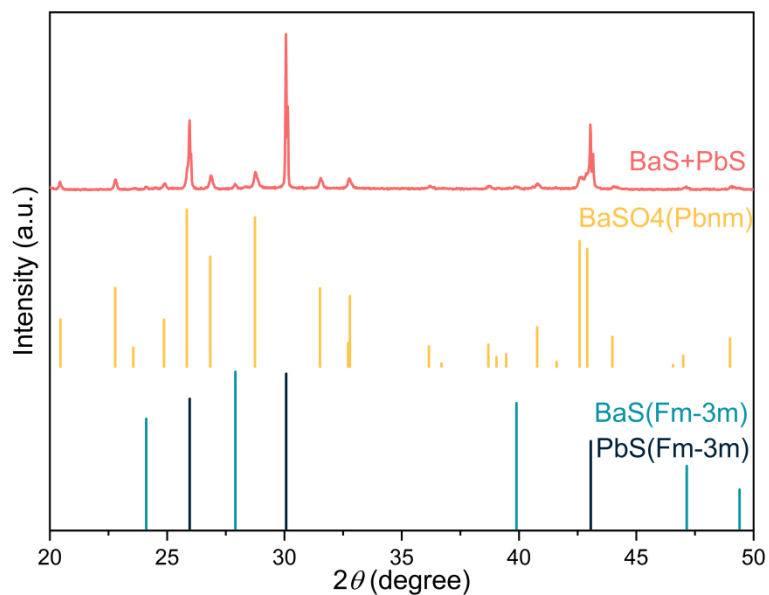

Figure S14. XRD of the powder obtained by grinding BaS powder and PbS powder homogeneously and then reacting at 700°C for 4 hrs.

Table S1. ICP data of  $Ba_{0.5}Pb_{0.5}S$ .

|            | Ba 138 ( $\times 10^{-3}$ mg/L) | Pb 208 ( $\times 10^{-3}$ mg/L) |
|------------|---------------------------------|---------------------------------|
| Standard 1 | 5.000                           | 5.000                           |
| Standard 2 | 9.967                           | 10.022                          |
| Standard 3 | 49.970                          | 50.019                          |
| Standard 4 | 100.013                         | 99.467                          |
| Blank      | 0.209                           | 0.062                           |
| Sample     | 210.383                         | 290.460                         |

Table S2. Comparison of crystal spacing and cell parameter data for BaS, PbS, and Ba<sub>0.5</sub>Pb<sub>0.5</sub>S from XRD, along with crystal spacing data for Ba<sub>0.5</sub>Pb<sub>0.5</sub>S from HAADF-STEM.

| Materials                             | (h k l) |                    |       |                    | Cell parameters<br>a=b=c |
|---------------------------------------|---------|--------------------|-------|--------------------|--------------------------|
|                                       | 200     |                    | 220   |                    |                          |
|                                       | 2θ(°)   | d(nm)              | 2θ(°) | d(nm)              |                          |
| BaS                                   | 27.91   | 0.319              | 39.89 | 0.226              | 6.386                    |
| PbS                                   | 30.07   | 0.297              | 43.06 | 0.210              | 5.936                    |
| Ba <sub>0.5</sub> Pb <sub>0.5</sub> S | 28.83   | 0.309 <sup>#</sup> | 41.14 | 0.219 <sup>#</sup> | 6.180                    |

<sup>#</sup>Data obtained from HAADF-STEM.

Table S3. XPS data of Ba<sub>0.5</sub>Pb<sub>0.5</sub>S.

| Element          | Peak Splitting (eV) | Peak ID           | Binding energy (eV) |
|------------------|---------------------|-------------------|---------------------|
| Ba               | 15.4                | 3d <sub>5/2</sub> | 780.8               |
|                  |                     | 3d <sub>3/2</sub> | 796.2               |
| Pb               | 4.9                 | 4f <sub>7/2</sub> | 137.2               |
|                  |                     | 4f <sub>5/2</sub> | 142.1               |
| PbO <sub>x</sub> | 4.9                 | 4f <sub>7/2</sub> | 138.8               |
|                  |                     | 4f <sub>5/2</sub> | 143.7               |
| S                | 1.2                 | 2p <sub>3/2</sub> | 160.1               |
|                  |                     | 2p <sub>1/2</sub> | 161.3               |
| SO <sub>x</sub>  |                     | 2p                | 162.3               |
